# Supplementary figures and images for: Comparative Study of Sargassum fusiforme Polysaccharides in Regulating Cecal and Fecal Microbiota of High-Fat Diet-Fed Mice
Source: MDPI journal article supplement (doi:10.3390/md19070364), 2021-06-24

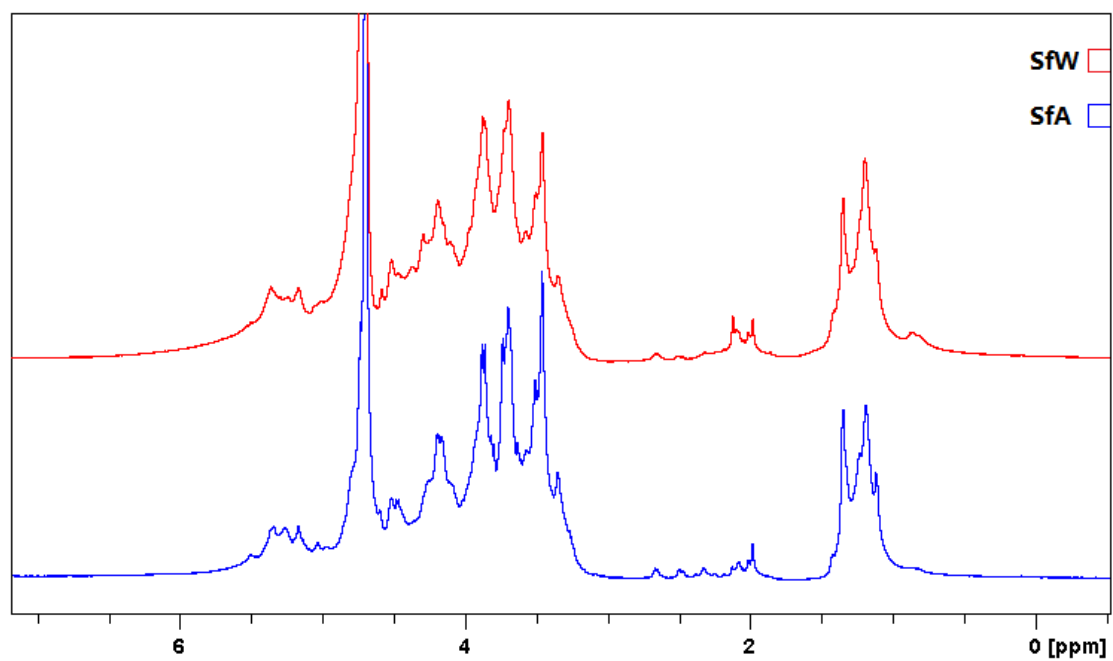

**Fig. S1**  $^1\text{H}$ -NMR spectra of *Sargassum fusiforme* polysaccharides SfW and SfA.

Supplement: s1 [file s1]
